# Supplementary material for: Single-cell multiplexed cytokine profiling of CD19 CAR-T cells reveals a diverse landscape of polyfunctional antigen-specific response
Source: Springer Nature journal article supplement (doi:10.1186/s40425-017-0293-7), 2017-10-24

Additional file 3 (Figure S1)

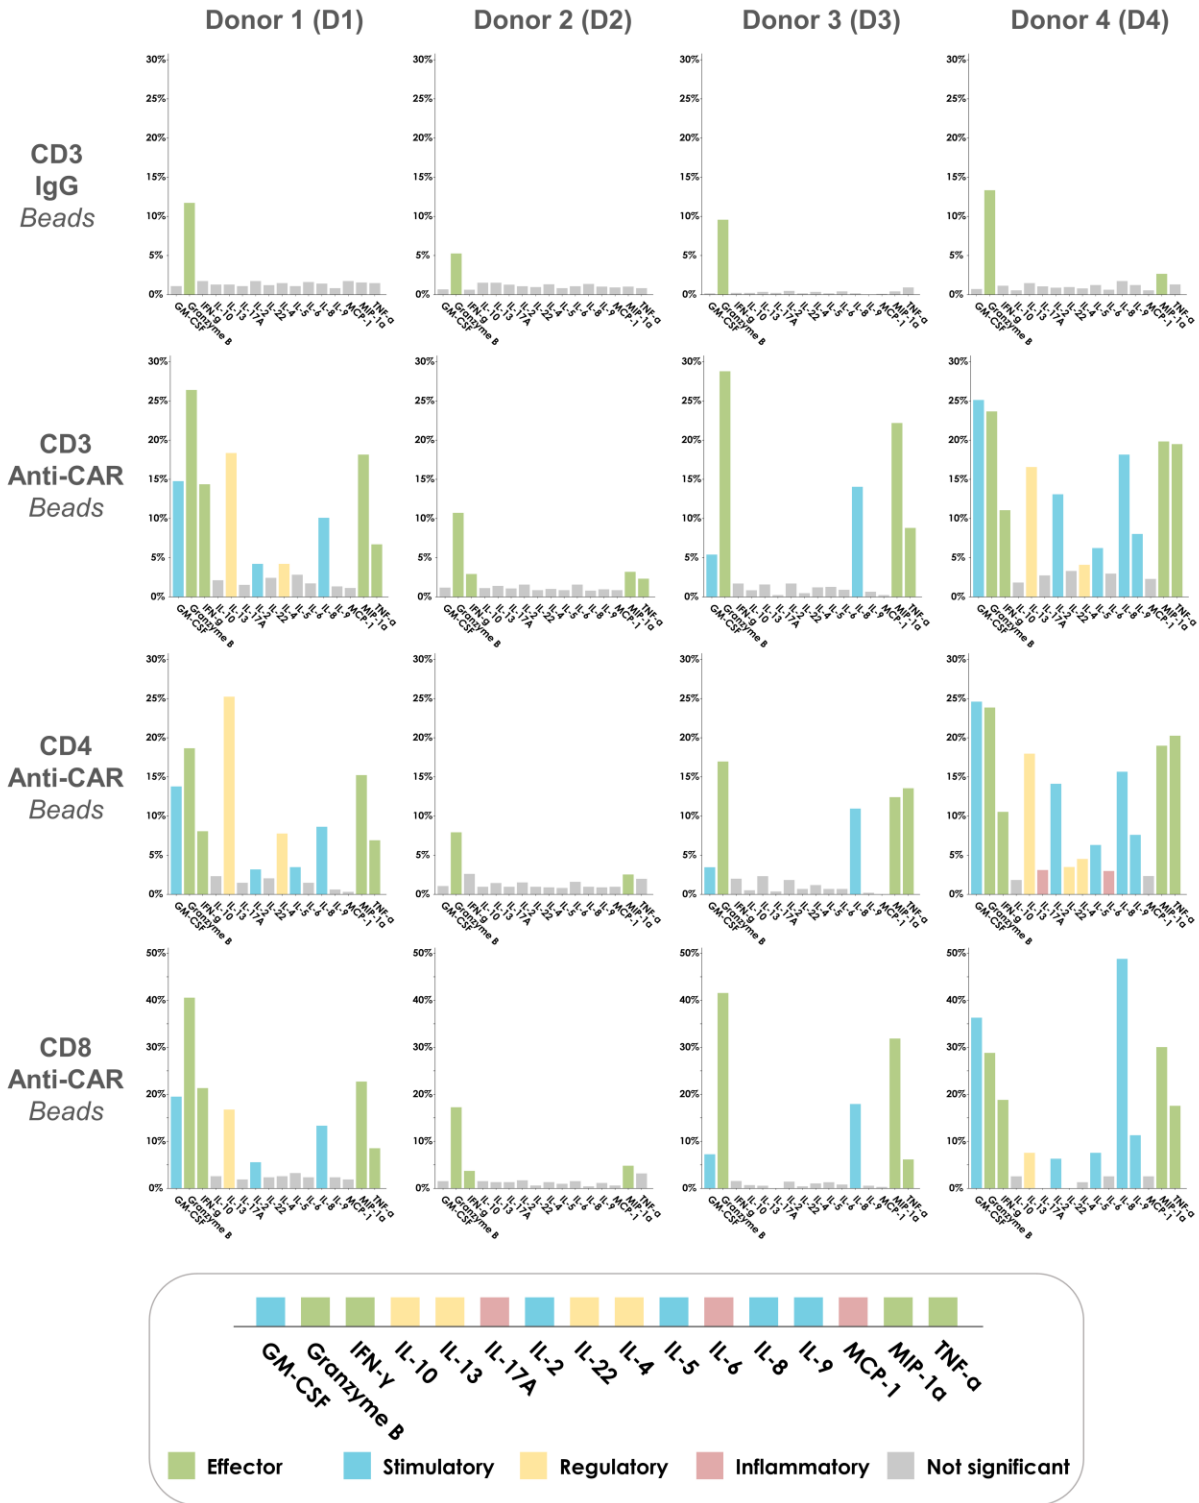

Supplement: MOESM3 [file 40425_2017_293_MOESM3_ESM.pdf]
